# Supplementary material
Source: PubMed Central journal article supplement (PMC9021884)
Supplement: NIHMS1793562-supplement-Supplementary_Materials.pdf [file NIHMS1793562-supplement-Supplementary_Materials.pdf]

## Supporting Information

### Synthesis of [<sup>18</sup>F]PS13 and Evaluation as a PET Radioligand for Cyclooxygenase-1 in Monkey

Carlotta Taddei<sup>†</sup>, Cheryl L. Morse<sup>†</sup>, Min-Jeong Kim<sup>†</sup>, Jeih-San Liow<sup>†</sup>, Jose Montero Santamaria<sup>†</sup>, Andrea Zhang<sup>†</sup>, Lester S. Manly<sup>†</sup>, Paolo Zanotti-Fregonara<sup>†</sup>, Robert L. Gladding<sup>†</sup>, Sami S. Zoghbi<sup>†</sup>, Robert B. Innis<sup>†</sup>, Victor W. Pike<sup>†</sup>

<sup>†</sup>Molecular Imaging Branch, National Institute of Mental Health, National Institutes of Health, Building 10, Room B3 C346A, 10 Center Drive, Bethesda, Maryland 20892-1003, United States.

#### Table of Contents

| Topic                                                                                                                                  | Display item(s) | Page   |
|----------------------------------------------------------------------------------------------------------------------------------------|-----------------|--------|
| Radiochromatogram for the HPLC separation of [ <sup>18</sup> F]PS13                                                                    | Figure S1       | S2     |
| Radiochromatogram for the HPLC analysis of [ <sup>18</sup> F]PS13                                                                      | Figure S2       | S2     |
| PET data obtained in monkey B with [ <sup>18</sup> F]PS13                                                                              | Figure S3       | S3     |
| Analysis of plasma in PET study of monkey B                                                                                            | Figure S4       | S3     |
| Analysis of PET data from monkey B                                                                                                     | Figure S5       | S4     |
| Uptake of radioactivity in monkey skull: monkeys A and B                                                                               | Figure S6       | S5     |
| Plasma free fraction values from monkey experiments                                                                                    | Table S1        | S6     |
| $V_T$ values in monkey B under baseline and pre-blocked conditions when studied with [ <sup>11</sup> C]PS13 and [ <sup>18</sup> F]PS13 | Table S2        | S7     |
| NMR spectra of <i>gem</i> -difluoroalkene, <b>5</b>                                                                                    | Figure S7–S9    | S8–S10 |

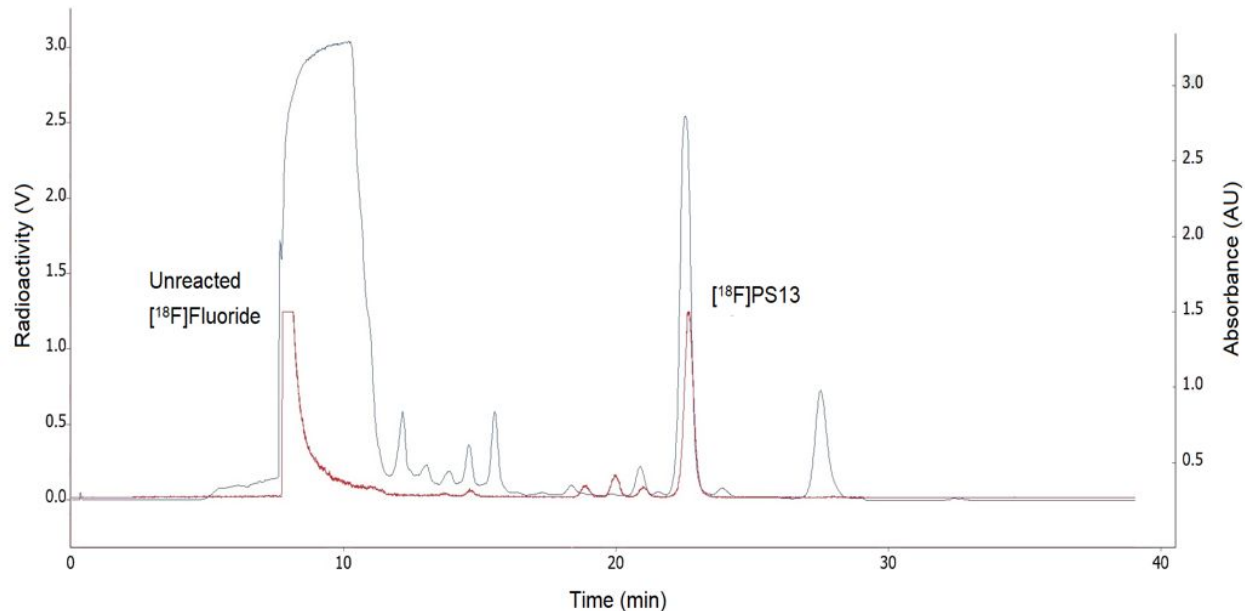

**Figure S1.** Representative reversed phase HPLC radiochromatogram for the separation of  $[^{18}\text{F}]\text{PS13}$ . See ‘Methods’ in main text for separation conditions.

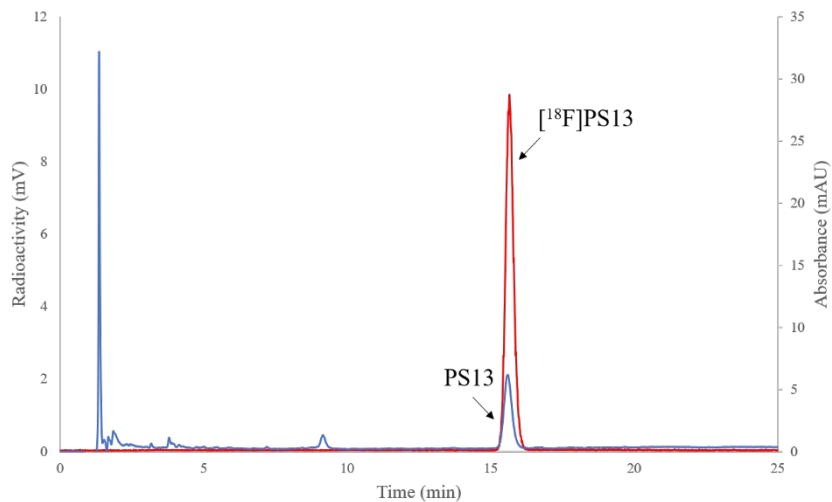

**Figure S2.** Representative reversed phase analytical HPLC radiochromatogram for  $[^{18}\text{F}]\text{PS13}$ . See ‘Methods’ in main text for analytical conditions.

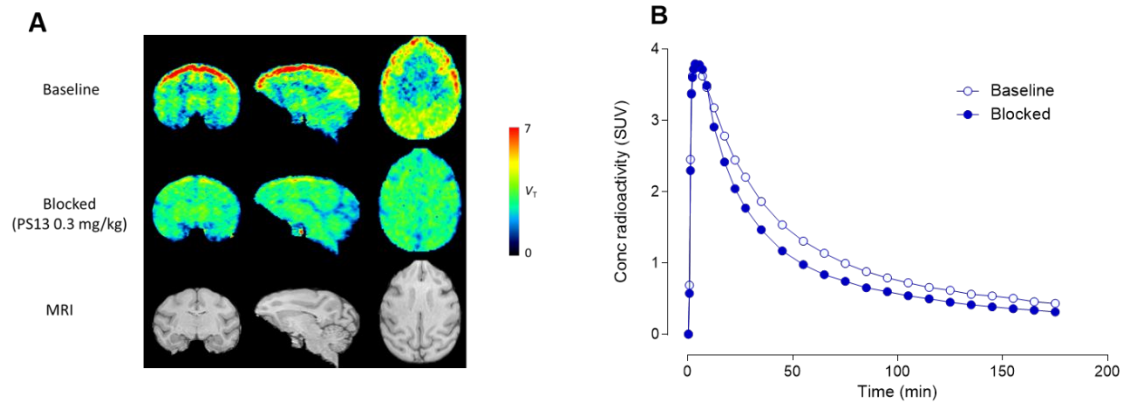

**Figure S3.** PET data obtained in monkey B with [ $^{18}\text{F}$ ]PS13. Panel A: images of brain  $V_T$  at baseline (top row) and under pre-blocked conditions (middle row), and corresponding MRI images (bottom row); (left column: coronal image; middle column: sagittal images; right column: transaxial images). Panel B: whole brain-time activity curves at baseline and under pre-blocked conditions.

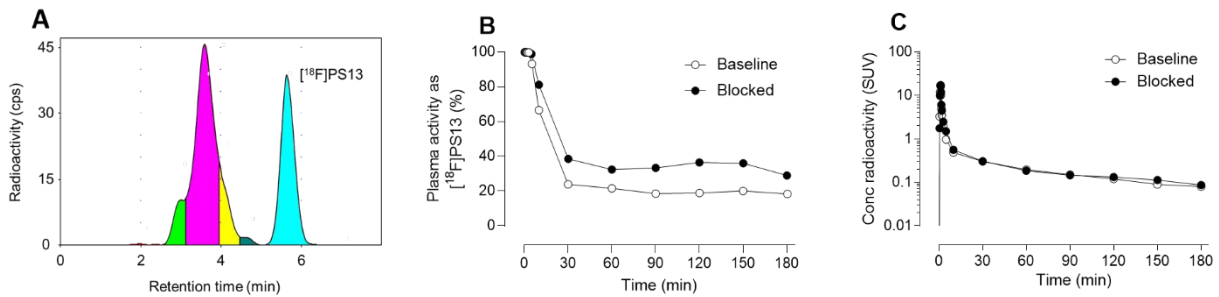

**Figure S4.** Analysis of plasma in monkey B after intravenous injection of [ $^{18}\text{F}$ ]PS13. Panel A: reversed phase radio-HPLC of plasma at 180 minutes after intravenous injection of [ $^{18}\text{F}$ ]PS13 at baseline. Panel B: time-course of percentage of radioactivity in plasma represented by unchanged [ $^{18}\text{F}$ ]PS13 at baseline and under pre-blocked conditions. Panel C: time-course of unchanged [ $^{18}\text{F}$ ]PS13 concentration in plasma at baseline and under pre-blocked conditions.

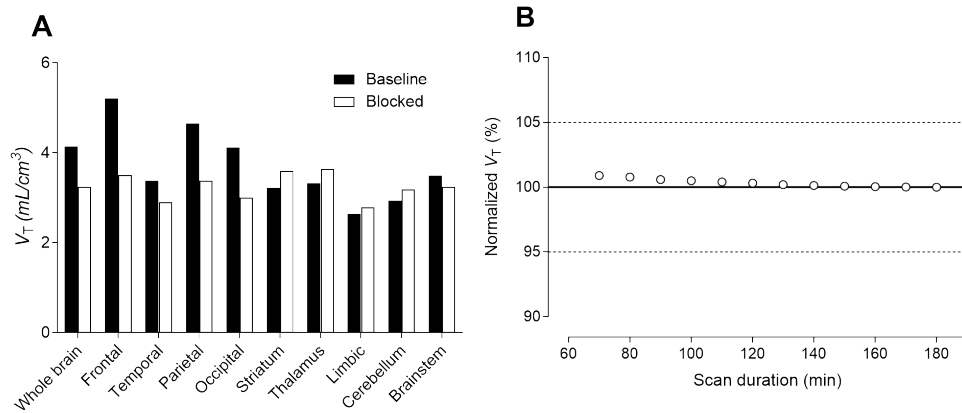

**Figure S5.** Analysis of PET data from experiment in monkey B with [<sup>18</sup>F]PS13. Panel A: regional  $V_T$  values at baseline and under pre-blocked conditions. Panel B: dependence of whole brain  $V_T$  on duration of PET data from time of radiotracer injection used for calculation with values normalized to the terminal value.

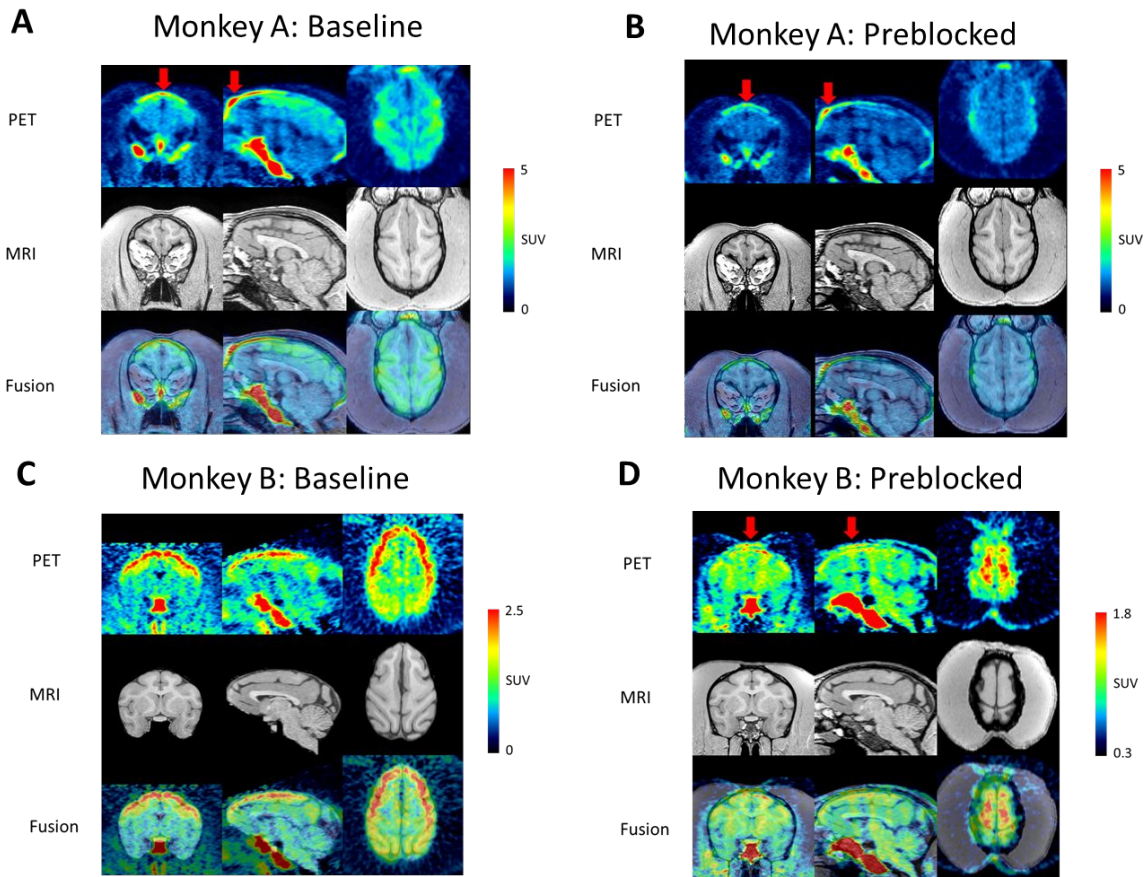

**Figure S6.** Uptake of radioactivity (SUV) in monkey skull regions after intravenous administration of  $[^{18}\text{F}]\text{PS13}$ . Panel A: monkey A at baseline. Panel B: monkey A under pre-blocked conditions. Panel C: monkey B at baseline. Panel D: monkey B under pre-blocked conditions. Top rows: PET images. Middle rows: corresponding MRI images. Bottom row: PET/MRI Fusion images. Left columns: coronal images. Middle columns: sagittal images. Right columns: transaxial images. Red arrows indicate skull regions with noticeable radioactivity uptake (Panels A, B, and D).

**Table S1.** Plasma free fraction ( $f_p$ ) values for [ $^{18}\text{F}$ ]PS13 in PET experiments.

| <b>Monkey</b> | <b>Study type</b> | <b><math>f_p</math> (%)<sup>a</sup></b> | <b>Normalized <math>f_p</math> (%)<sup>b</sup></b> |
|---------------|-------------------|-----------------------------------------|----------------------------------------------------|
| A             | Baseline          | 1.14                                    | 1.35                                               |
| B             | Baseline          | 2.79                                    | 1.66                                               |
| A             | Pre-block         | 1.57                                    | 1.36                                               |
| B             | Pre-block         | 1.42                                    | 4.52                                               |

<sup>a</sup> Values before normalization against a stored reference sample.

<sup>b</sup> Values normalized against that measured on the same day for a single reference sample to account for factors, such as operator variation.

**Table S2.**  $V_T$  values in monkey B under baseline and pre-blocked conditions when studied with [ $^{11}\text{C}$ ]PS13 and [ $^{18}\text{F}$ ]PS13.<sup>a</sup>

| Region           | $^{18}\text{F}$ ]PS13 |                  |                 | $^{11}\text{C}$ ]PS13 |                  |                 |
|------------------|-----------------------|------------------|-----------------|-----------------------|------------------|-----------------|
|                  | Baseline<br>$V_T$     | Blocked<br>$V_T$ | Blocking<br>(%) | Baseline<br>$V_T$     | Blocked<br>$V_T$ | Blocking<br>(%) |
| Whole brain      | 4.14                  | 3.24             | 22              | 7.47                  | 4.18             | 44              |
| Frontal cortex   | 5.21                  | 3.51             | 33              | 9.44                  | 4.39             | 53              |
| Temporal cortex  | 3.38                  | 2.90             | 14              | 6.36                  | 3.67             | 42              |
| Parietal cortex  | 4.65                  | 3.38             | 27              | 8.65                  | 4.23             | 51              |
| Occipital cortex | 4.12                  | 3.00             | 27              | 7.79                  | 4.11             | 47              |
| Striatum         | 3.22                  | 3.60             | -12             | 6.35                  | 4.52             | 29              |
| Thalamus         | 3.32                  | 3.64             | -9              | 6.51                  | 4.67             | 28              |
| Limbic region    | 2.64                  | 2.79             | -5              | 5.38                  | 3.86             | 28              |
| Cerebellum       | 2.94                  | 3.18             | -8              | 5.07                  | 4.35             | 14              |
| Brainstem        | 3.49                  | 3.24             | 7               | 5.08                  | 4.26             | 16              |

<sup>a</sup>  $V_T$  values were calculated from Logan graphical analysis. See main text for detailed description of experiment with [ $^{18}\text{F}$ ]PS13. The molar activity of the radioligand at baseline was 3.11 GBq/ $\mu\text{mol}$  and the amount of carrier PS13 injected was 3.0 nmol/kg. The experiment with [ $^{11}\text{C}$ ]PS13 was performed and analyzed identically, except that the molar activity of the radioligand at baseline was 221 GBq/ $\mu\text{mol}$  and the dose of carrier was far less at 0.10 nmol/kg. The pre-blocking dose of PS13 in each case was 0.3 mg/kg i.v., administered over 15–5 min before the radioligand.

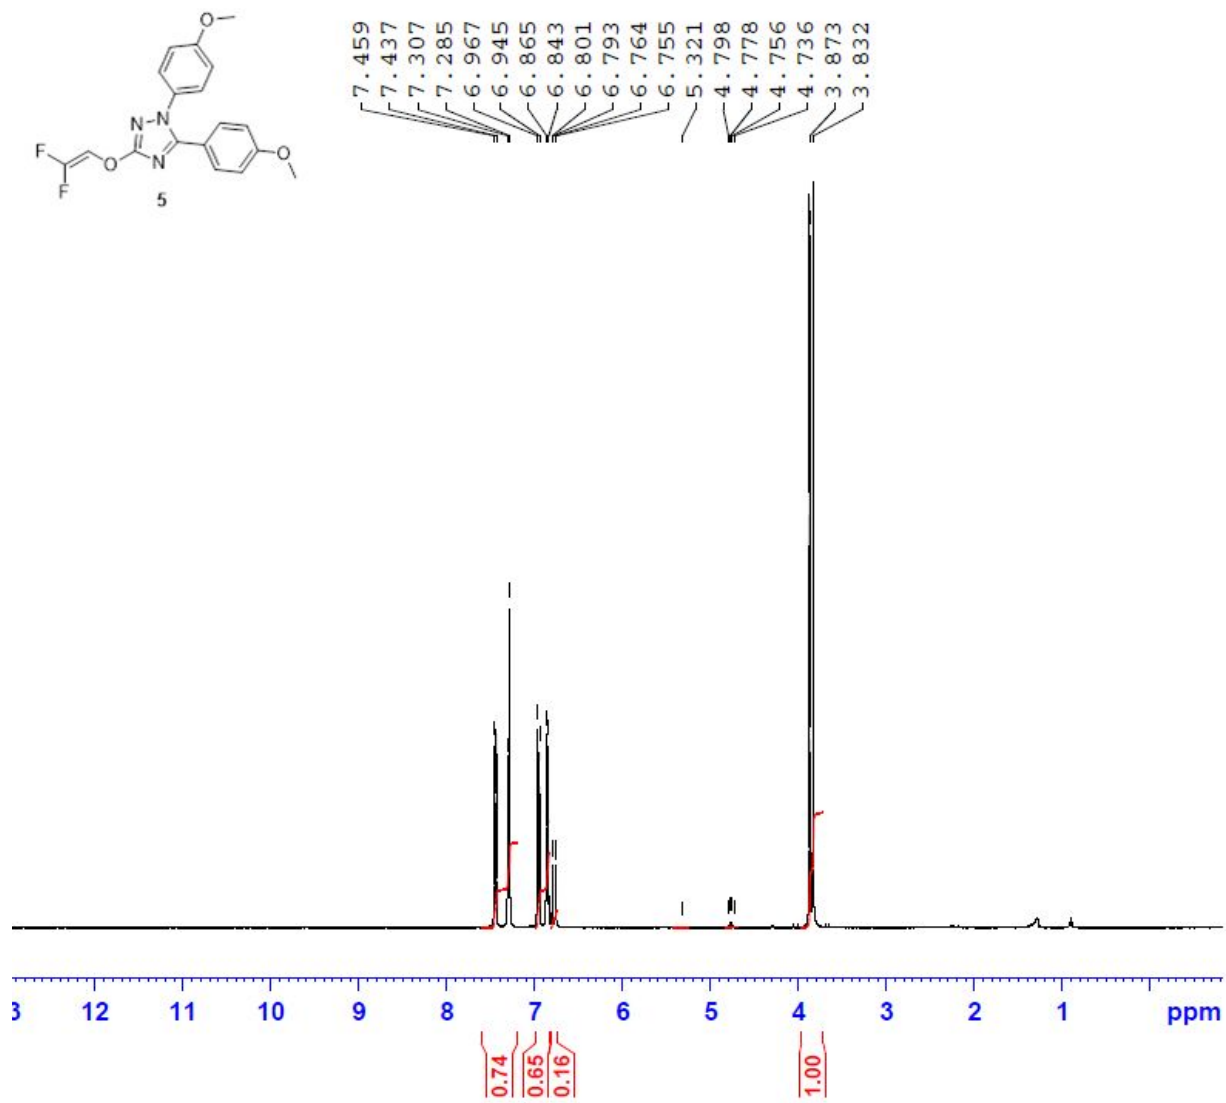

**Figure S7.** <sup>1</sup>H NMR (CDCl<sub>3</sub>) of *gem*-difluoroalkene, **5**.



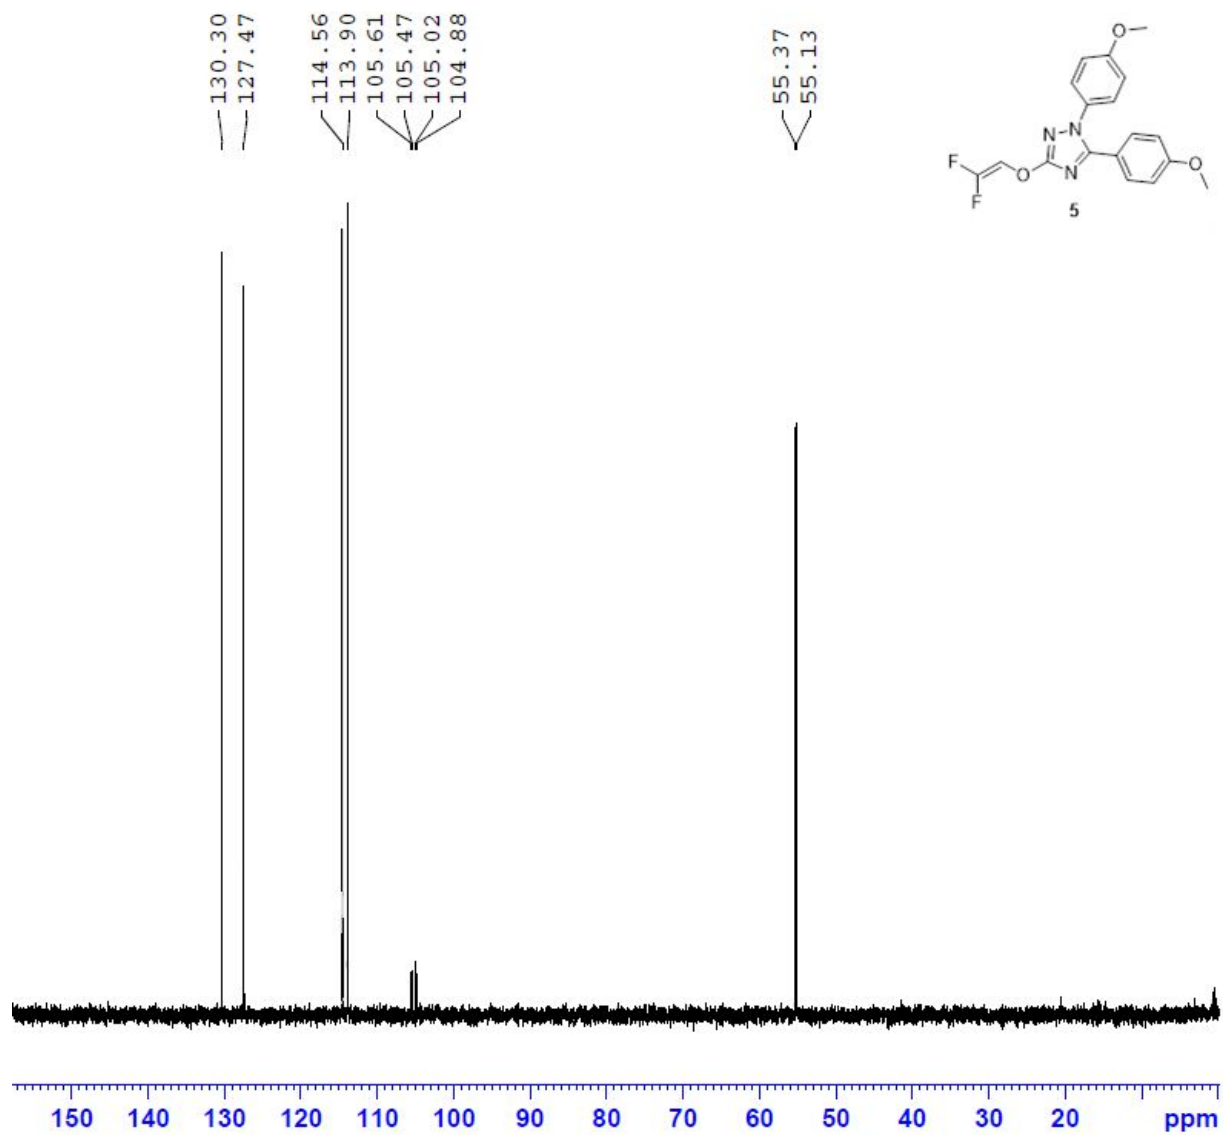

**Figure S8.**  $^{13}\text{C}$  NMR (dept 135,  $\text{CDCl}_3$ ) of *gem*-difluoroalkene, **5**.

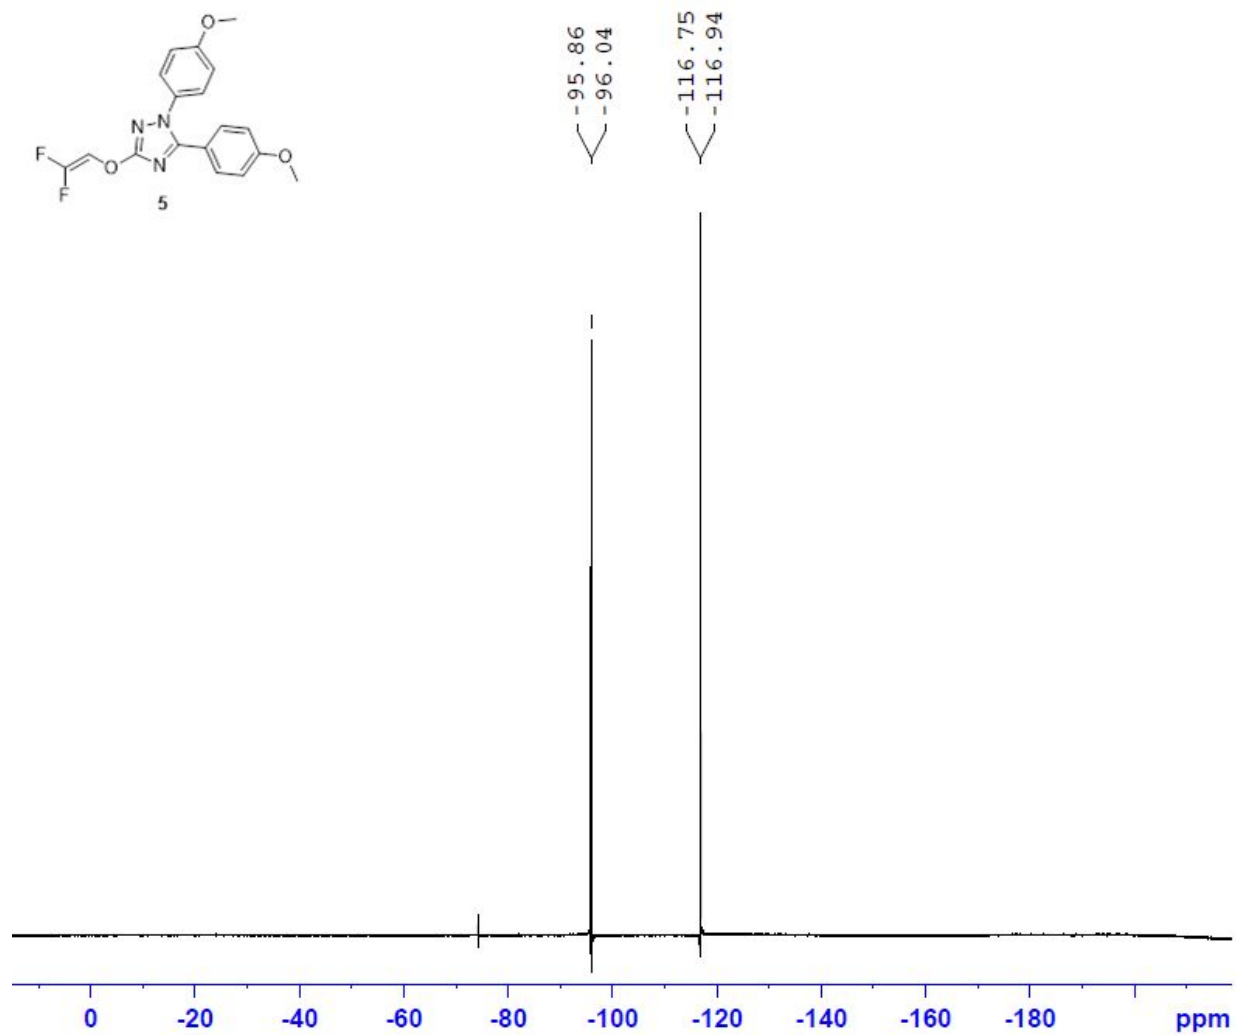

**Figure S9.**  $^{19}\text{F}$  NMR (CDCl<sub>3</sub>) of *gem*-difluoroalkene, **5**.
